# Supplementary material for: Evaluation and Prediction Analysis of 3- and 5-Year Relative Survival Rates of Patients with Cervical Cancer: A Model-Based Period Analysis
Source: PubMed Central journal article supplement — Cancer Control. 2024 Feb 26;31:10732748241232324. doi: 10.1177/10732748241232324 (PMC10898299; doi:10.1177/10732748241232324), 2024-02-26
Supplement: sj-pdf-1-ccx-10.1177_10732748241232324.pdf [file sj-pdf-1-ccx-10.1177_10732748241232324.pdf]

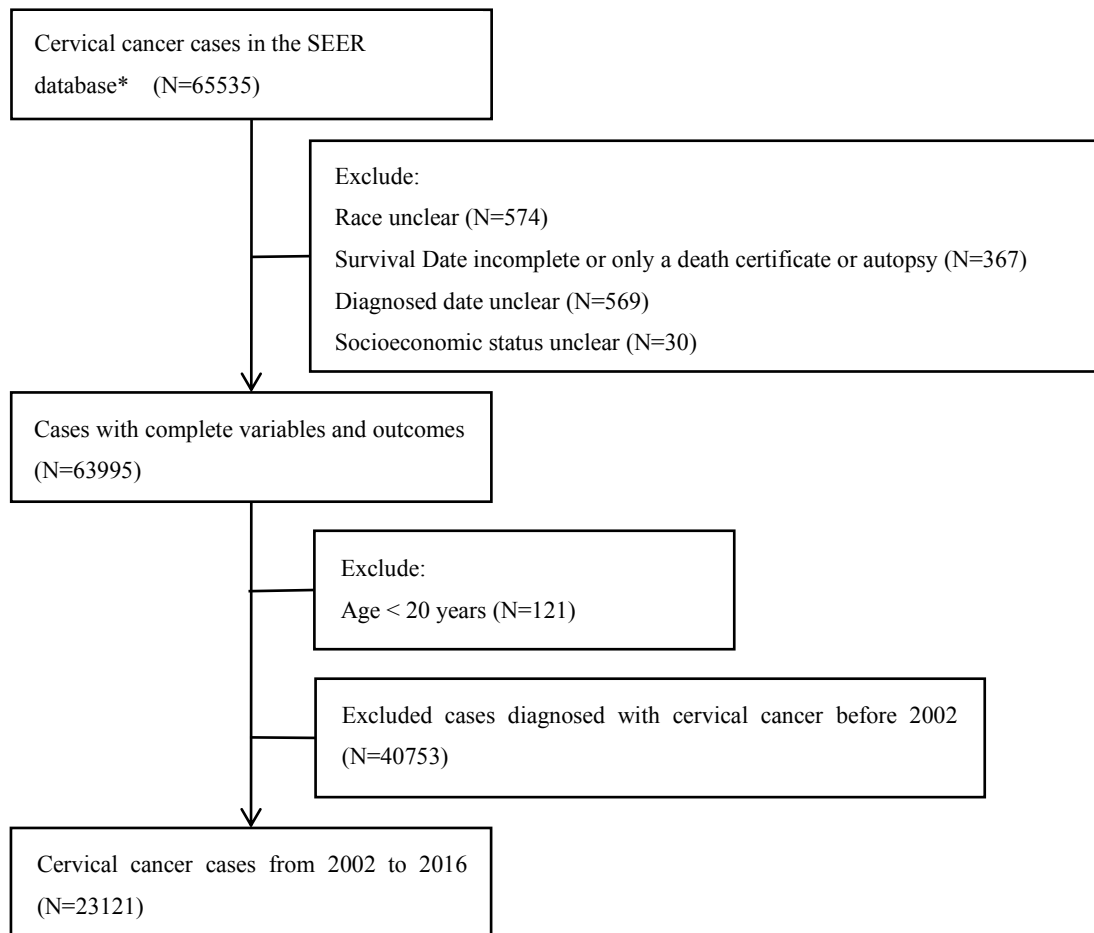

\* cervical cancer was defined based on ICD-O-3 system with site codes C53.0-53.9 and histology codes 8010-8617 and 8940-8941, restricting to females and microscopically confirmed.

Supplementary figure 1 study population of cervical cancer cases in the SEER database in the present study
